# Supplementary material
Source: MDPI journal article supplement (https://www.mdpi.com/2073-4433/13/8/1304)
Supplement: s1 [file s1]

# Characteristics and Source Analysis of PM<sub>1</sub> in a Typical Steel-Industry City, Southwest China

Huibin Shi, Xin Cheng, Jinjin Wang, Zijing Li and Yi Huang

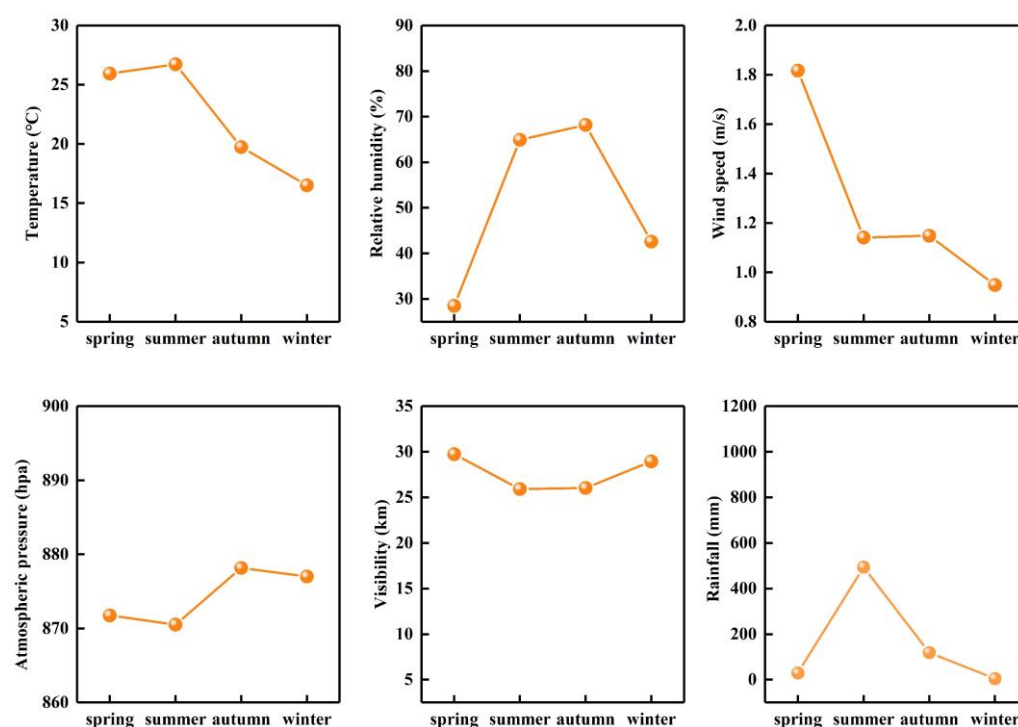

Figure S1. Meteorological parameters of Panzhihua (2018-2019).

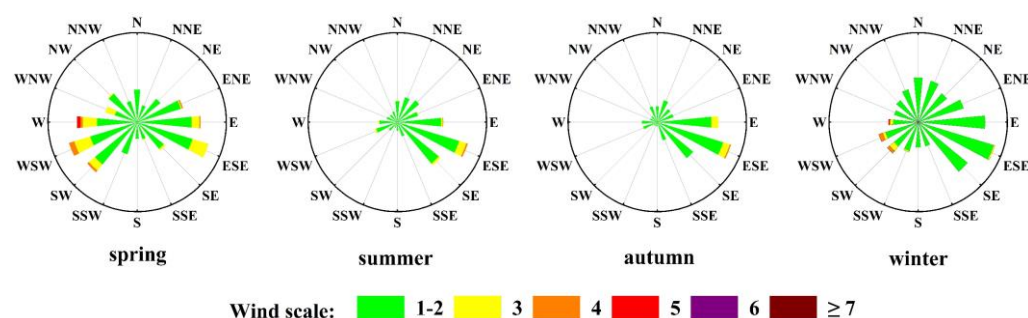

Figure S2. Wind frequency rose chart of Panzhihua (2018-2019).

**Table S1.** Seasonal distribution characteristics of the PM<sub>1</sub> mass concentrations (µg/m<sup>3</sup>).

|     |         | Spring | Summer | Autumn | Winter |
|-----|---------|--------|--------|--------|--------|
| NNP | Max     | 55.84  | 39.05  | 44.73  | 145.30 |
|     | Min     | 17.95  | 16.36  | 12.12  | 22.10  |
|     | Average | 30.09  | 26.86  | 30.48  | 43.84  |
|     | SD      | 9.41   | 6.52   | 7.13   | 22.44  |
| HMK | Max     | 51.49  | 32.85  | 37.06  | 67.02  |
|     | Min     | 14.38  | 16.45  | 17.08  | 20.77  |
|     | Average | 27.33  | 25.94  | 29.33  | 35.25  |
|     | SD      | 8.89   | 4.52   | 5.88   | 9.36   |

SD means standard deviation.

**Table S2.** Seasonal distribution characteristics of PTEs in PM<sub>1</sub> of NNP (ng/m<sup>3</sup>).

|        |         | V     | Cr    | Mn    | Ni    | Cu     | Zn     | As    | Cd   | Pb     |
|--------|---------|-------|-------|-------|-------|--------|--------|-------|------|--------|
| Spring | Max     | 4.34  | 15.49 | 25.31 | 18.47 | 440.88 | 174.95 | 8.64  | 2.89 | 262.43 |
|        | Min     | 0.92  | 0.14  | 7.37  | 0.88  | 106.76 | 18.72  | 1.68  | 0.64 | 38.68  |
|        | Average | 2.50  | 5.22  | 14.91 | 4.76  | 213.39 | 69.33  | 4.62  | 1.49 | 129.67 |
|        | SD      | 0.87  | 3.77  | 5.56  | 3.64  | 88.01  | 42.80  | 1.87  | 0.69 | 69.72  |
| Summer | Max     | 13.68 | 22.50 | 21.37 | 11.00 | 514.99 | 244.70 | 14.44 | 2.47 | 315.59 |
|        | Min     | 0.76  | 2.07  | 5.47  | 0.75  | 109.28 | 28.08  | 2.08  | 0.17 | 31.71  |
|        | Average | 3.97  | 6.27  | 13.55 | 4.21  | 232.52 | 77.39  | 5.85  | 0.98 | 123.41 |
|        | SD      | 2.59  | 4.17  | 4.29  | 2.26  | 123.96 | 57.30  | 3.12  | 0.68 | 76.71  |
| Autumn | Max     | 6.64  | 13.08 | 41.31 | 6.88  | 407.56 | 563.12 | 14.13 | 4.77 | 580.37 |
|        | Min     | 1.26  | 0.98  | 6.09  | 0.55  | 77.87  | 19.48  | 1.95  | 0.28 | 21.32  |
|        | Average | 3.01  | 4.54  | 16.64 | 3.15  | 172.63 | 109.77 | 6.82  | 1.68 | 177.20 |
|        | SD      | 1.25  | 2.90  | 7.50  | 1.47  | 79.17  | 100.48 | 2.82  | 1.12 | 128.87 |
| Winter | Max     | 7.02  | 12.99 | 73.17 | 24.24 | 348.83 | 243.10 | 13.49 | 7.56 | 589.77 |
|        | Min     | 0.86  | 1.68  | 7.03  | 2.73  | 86.07  | 11.33  | 2.04  | 0.58 | 64.12  |
|        | Average | 2.92  | 5.24  | 24.14 | 5.61  | 199.87 | 108.32 | 5.50  | 2.40 | 200.23 |
|        | SD      | 1.68  | 2.17  | 13.38 | 4.56  | 86.15  | 59.86  | 2.64  | 1.51 | 135.36 |

**Table S3.** Seasonal distribution characteristics of PTEs in PM<sub>1</sub> of HMK (ng/m<sup>3</sup>).

|        |         | V     | Cr    | Mn    | Ni    | Cu     | Zn     | As    | Cd   | Pb     |
|--------|---------|-------|-------|-------|-------|--------|--------|-------|------|--------|
| Spring | Max     | 2.54  | 19.14 | 37.85 | 11.70 | 31.39  | 131.55 | 9.31  | 1.92 | 136.07 |
|        | Min     | 0.43  | 0.29  | 3.21  | 0.19  | 8.89   | 15.68  | 0.57  | 0.31 | 16.82  |
|        | Average | 1.26  | 3.22  | 9.14  | 2.16  | 18.59  | 56.39  | 3.40  | 1.00 | 68.39  |
|        | SD      | 0.62  | 3.58  | 6.37  | 2.30  | 5.26   | 27.90  | 2.14  | 0.37 | 32.56  |
| Summer | Max     | 7.99  | 6.94  | 17.21 | 3.90  | 62.53  | 268.86 | 13.58 | 2.23 | 290.82 |
|        | Min     | 1.04  | 2.07  | 4.88  | 0.23  | 15.47  | 27.53  | 1.18  | 0.70 | 49.46  |
|        | Average | 3.09  | 3.72  | 10.33 | 1.48  | 35.41  | 98.68  | 5.20  | 1.37 | 146.60 |
|        | SD      | 2.08  | 1.16  | 3.50  | 1.21  | 13.24  | 59.30  | 2.92  | 0.50 | 67.12  |
| Autumn | Max     | 11.16 | 9.88  | 25.19 | 20.51 | 100.39 | 387.21 | 12.70 | 3.43 | 273.82 |
|        | Min     | 0.83  | 2.33  | 2.96  | 0.38  | 15.40  | 19.26  | 0.53  | 0.49 | 26.08  |
|        | Average | 2.97  | 5.26  | 13.01 | 4.53  | 36.90  | 128.90 | 5.57  | 1.64 | 148.91 |
|        | SD      | 2.12  | 1.88  | 5.55  | 5.04  | 18.48  | 89.83  | 2.90  | 0.78 | 63.23  |
| Winter | Max     | 4.50  | 24.51 | 42.86 | 37.17 | 83.29  | 358.35 | 7.13  | 3.53 | 254.79 |
|        | Min     | 0.45  | 3.08  | 4.88  | 1.87  | 9.05   | 27.37  | 0.75  | 0.42 | 25.90  |
|        | Average | 1.51  | 7.38  | 12.93 | 5.86  | 25.53  | 83.88  | 3.67  | 1.57 | 101.48 |
|        | SD      | 1.04  | 5.19  | 7.89  | 6.43  | 14.61  | 63.26  | 1.98  | 0.77 | 58.66  |

SD means standard deviation.

**Table S4.** QA/QC parameters for ICP-MS analysis of PTEs.

| Species | LOD (ng/m <sup>3</sup> ) | Repeatability (%) |
|---------|--------------------------|-------------------|
| V       | 0.08                     | ≤ 10              |
| Cr      | 0.10                     | ≤ 10              |
| Mn      | 0.05                     | ≤ 10              |
| Ni      | 0.04                     | ≤ 10              |
| Cu      | 0.04                     | ≤ 10              |
| Zn      | 0.10                     | ≤ 10              |
| As      | 0.30                     | ≤ 10              |
| Cd      | 0.01                     | ≤ 10              |
| Pb      | 0.03                     | ≤ 10              |

**Table S5.** The reference concentration limits for PTEs (GB 3095-2012).

| Species | Reference concentration limits (µg/m <sup>3</sup> ) |
|---------|-----------------------------------------------------|
| Cr(VI)  | 0.000025                                            |
| As      | 0.006                                               |
| Cd      | 0.005                                               |
| Pb      | 0.5                                                 |
